# Supplementary material for: Health-related quality of life in patients with a germline BRCA mutation and metastatic pancreatic cancer receiving maintenance olaparib
Source: PubMed Central journal article supplement — Ann Oncol. 2019 Sep 28;30(12):1959–68. doi: 10.1093/annonc/mdz406 (PMC6938600; doi:10.1093/annonc/mdz406), 2019-09-28
Supplement: mdz406_supplementary_data.pdf [file mdz406_supplementary_data.pdf]

## **Supplementary material**

### **Health-related quality of life in patients with a germline BRCA mutation and metastatic pancreatic cancer receiving maintenance olaparib**

Pascal Hammel, Hedy L Kindler, Michele Reni, Eric Van Cutsem, Teresa Macarulla, Michael J Hall, Joon Oh Park, Daniel Hochhauser, Dirk Arnold, Do-Youn Oh, Anke Reinacher-Schick, Giampaolo Tortora, Hana Algül, Eileen M O'Reilly, David McGuinness, Karen Y Cui, Seongjung Joo, Hyun Kyoo Yoo, Nikunj Patel, Talia Golan, on behalf of the POLO Investigators

**Supplementary Figure 1: Mean score at baseline for EORTC QLQ-C30 (A) Global Health Status and physical functioning and (B) symptom scales**

**(A)**

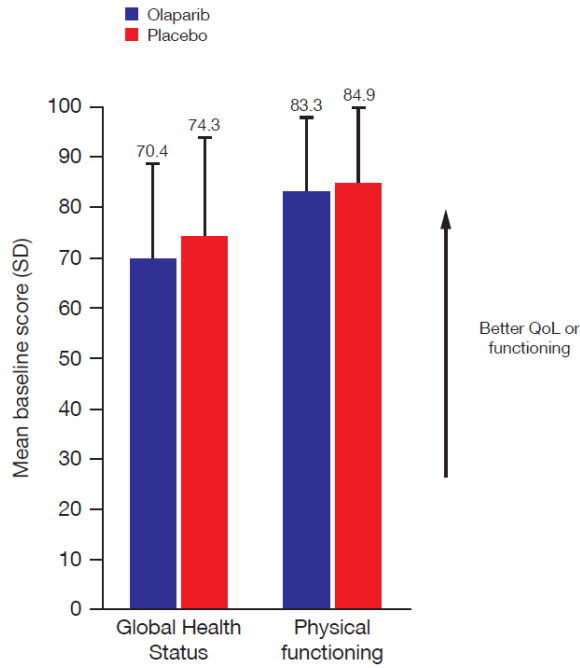

**(B)**

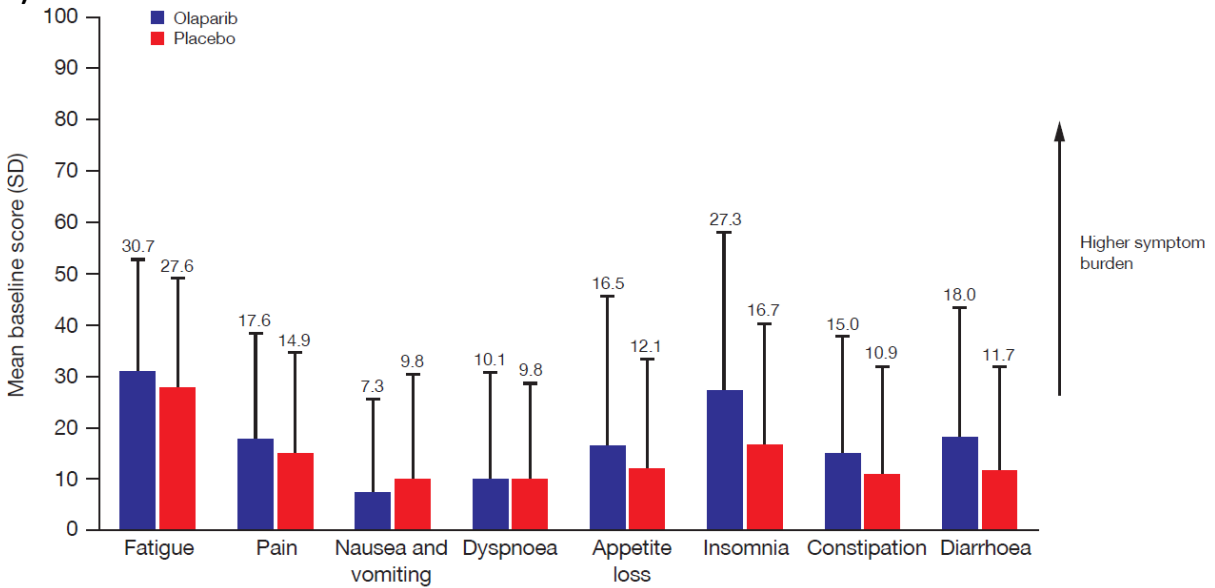

QoL, quality of life; SD, standard deviation

**Supplementary Figure 2: Patient disposition and EORTC QLQ-30 questionnaire compliance rates**

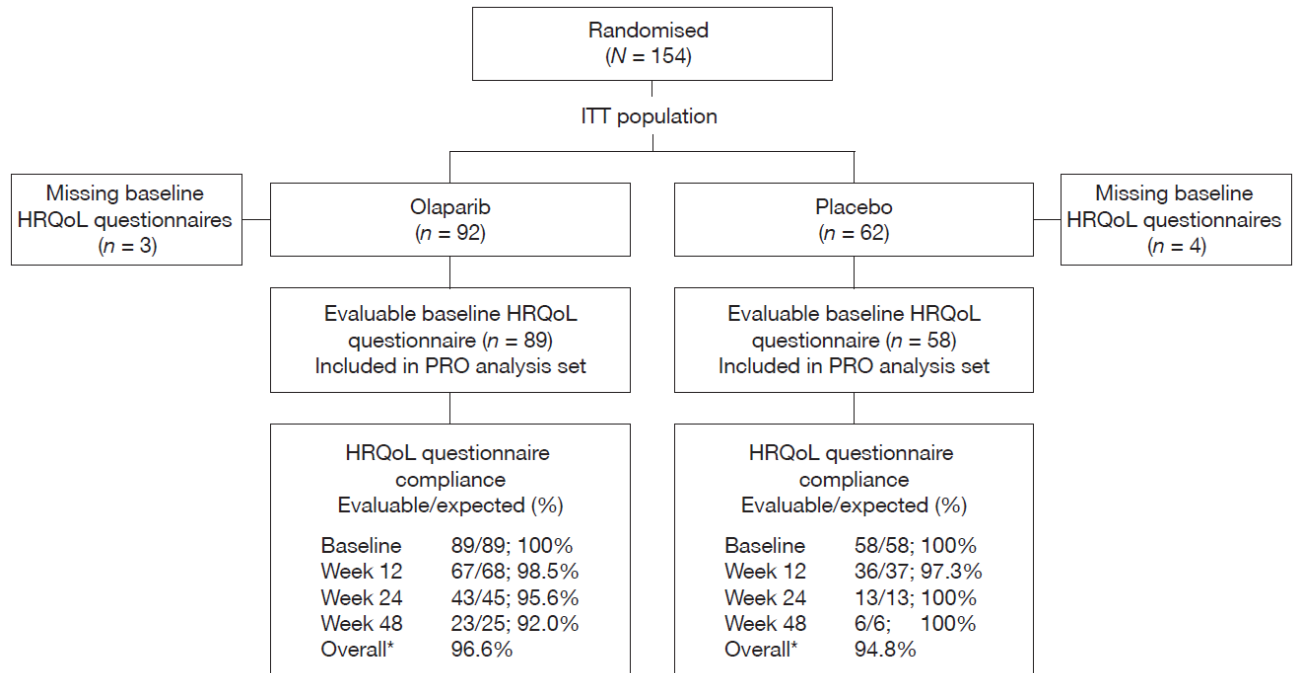

\*Overall compliance defined as the number of patients with an evaluable baseline and  $\geq 1$  evaluable follow-up form, divided by the number of patients expected to have completed  $\geq 1$  baseline form. Percentages are based on the PRO analysis set. HRQoL, health related quality of life; PRO, patient reported outcomes
